# Supplementary material for: Dysregulated Glucuronidation of Bilirubin Exacerbates Liver Inflammation and Fibrosis in Schistosomiasis Japonica through the NF-κB Signaling Pathway
Source: MDPI journal article supplement (doi:10.3390/pathogens13040287), 2024-03-28
Supplement: s1 [file s1]

Table S1. Sequences of all primers analyzed by real-time PCR

|       | Gene                   | Forward (5' → 3')      | Reverse (5' → 3')     |
|-------|------------------------|------------------------|-----------------------|
| Human | UGT1A1                 | CTCTCCAGCCTTCACAAG     | CGGTAGCCATAAGCACAA    |
|       | p65                    | GGCAGGAAGAGGAGGTTTCG   | AGGACGTTGTGTTTCCTTCCG |
|       | IKK- $\beta$           | TCCTTCAGGACCGAGCAAAG   | CGTTCGATGATGCGGTTGTT  |
|       | I $\kappa$ B- $\alpha$ | AGAAGGAGCGGCTACTGGAT   | GCCTCCGCCACTTACGAG    |
|       | $\beta$ -actin         | GGCACTCTTCCAGCCTTCC    | GAGCCGCCGATCCACAC     |
| Mouse | UGT1A1                 | CCTATGTCAACGCCTCTG     | CATCATCACCATCGGAACT   |
|       | PXR                    | CCCATCAACGTAGAGGAGGA   | TCTGAAAAACCCCTTGCATC  |
|       | CAR                    | CTCAAGGAAAGCAGGGTCAG   | AGTTCCTCGGCCCATTATTCT |
|       | Collagen I             | ACTGGCAACCTCAAGAAGTCCC | ACGCAAGGCCATGAGACTCC  |
|       | Collagen III           | ACGCAAGGCCATGAGACTCC   | GCAAACAGGGCCAATGTCCA  |
|       | $\alpha$ -SMA          | CTATGCTCTGCCTCATGCCA   | CTCACGCTCAGCAGTAGTCA  |
|       | $\beta$ -actin         | CCACCATGTACCCAGGCATT   | ACGCAGCTCAGTAACAGTCC  |

Table S2. Comparison of ALT positive rate in patients with normal and abnormal TBIL

| TBIL         | ALT      |          | Total number | $\chi^2$ | <i>P</i> |
|--------------|----------|----------|--------------|----------|----------|
|              | Positive | Negative |              |          |          |
| Positive     | 14       | 166      | 180          | 3.975    | 0.046    |
| Negative     | 23       | 542      | 565          |          |          |
| Total number | 37       | 708      | 745          |          |          |

Table S3. Comparison of AST positive rate in patients with normal and abnormal TBIL

| TBIL         | AST      |          | Total number | $\chi^2$ | <i>P</i> |
|--------------|----------|----------|--------------|----------|----------|
|              | Positive | Negative |              |          |          |
| Positive     | 57       | 123      | 180          | 39.555   | 0.000    |
| Negative     | 66       | 499      | 565          |          |          |
| Total number | 123      | 622      | 745          |          |          |

Table S4. Comparison of HA positive rate in patients with normal and abnormal TBIL

| TBIL         | HA       |          | Total number | $\chi^2$ | <i>P</i> |
|--------------|----------|----------|--------------|----------|----------|
|              | Positive | Negative |              |          |          |
| Positive     | 124      | 56       | 180          | 0.507    | 0.477    |
| Negative     | 373      | 192      | 565          |          |          |
| Total number | 497      | 248      | 745          |          |          |

Table S5. Comparison of LN positive rate in patients with normal and abnormal TBIL

| TBIL         | LN       |          | Total number | $\chi^2$ | <i>P</i> |
|--------------|----------|----------|--------------|----------|----------|
|              | Positive | Negative |              |          |          |
| Positive     | 134      | 46       | 180          | 22.100   | 0.000    |
| Negative     | 309      | 256      | 565          |          |          |
| Total number | 443      | 302      | 745          |          |          |

Table S6. Comparison of PIIP positive rate in patients with normal and abnormal TBIL

| TBIL         | PIIP     |          | Total number | $\chi^2$ | <i>P</i> |
|--------------|----------|----------|--------------|----------|----------|
|              | Positive | Negative |              |          |          |
| Positive     | 18       | 162      | 180          | 0.855    | 0.355    |
| Negative     | 71       | 494      | 565          |          |          |
| Total number | 89       | 656      | 745          |          |          |

Table S7. Comparison of CIV positive rate in patients with normal and abnormal TBIL

| TBIL         | CIV      |          | Total number | $\chi^2$ | <i>P</i> |
|--------------|----------|----------|--------------|----------|----------|
|              | Positive | Negative |              |          |          |
| Positive     | 109      | 71       | 180          | 34.012   | 0.000    |
| Negative     | 203      | 362      | 565          |          |          |
| Total number | 312      | 433      | 745          |          |          |
